# Supplementary material
Source: ML conference proceedings conference paper supplement (https://proceedings.mlr.press/v119/wang20aa.html)
Supplement: Supplementary file [file wang20aa-supp.pdf]

## A. Proof of Proposition 1

**Proposition 1.** Given a box  $B = (l_1, r_1] \times \cdots \times (l_d, r_d]$  and a point  $x \in \mathbb{R}^d$ . The closest  $\ell_p$  distance ( $p \in [0, \infty]$ ) from  $x$  to  $B$  is  $\|z - x\|_p$  where:

$$z_i = \begin{cases} x_i, & l_i \leq x_i \leq u_i \\ l_i, & x_i < l_i \\ u_i, & x_i > u_i. \end{cases}$$

*Proof.* For  $p > 0$ , The goal is to minimize the following objective:

$$\begin{aligned} \min_z \|z - x\|_p^p &= \min_z \sum_{i=1}^d |z_i - x_i|^p \\ \text{s.t. } &l_i < z_i \leq r_i, \quad \forall i \in [d]. \end{aligned}$$

And for  $p = 0$ , the objective is

$$\begin{aligned} \min_z \|z - x\|_0 &= \min_z \sum_{i=1}^d \mathbf{I}(z_i \neq x_i) \\ \text{s.t. } &l_i < z_i \leq r_i, \quad \forall i \in [d]. \end{aligned}$$

where  $\mathbf{I}(\cdot)$  is an indicator function. For  $p = \infty$ , the objective is

$$\begin{aligned} \min_z \|z - x\|_\infty &= \min_z \sum_{i=1}^d |z_i - x_i| \\ \text{s.t. } &l_i < z_i \leq r_i, \quad \forall i \in [d]. \end{aligned}$$

Since each term in the summation is separable, we can consider minimizing each term in the summation signs separately. Given the constraints on  $z_i$ , the minimum is achieved at the condition specified in Eq. (3) regardless of the choice of  $p$ :

$$z_i = \begin{cases} x_i, & l_i \leq x_i \leq u_i \\ l_i, & x_i < l_i \\ u_i, & x_i > u_i. \end{cases}$$

□

## B. Closed form update rule for $\ell_p$ Stump Ensemble Training

For exponential loss we can rewrite eq (15) as

$$\begin{aligned} \sum_{i=1}^{N-1} L(\tilde{D}(\lceil \epsilon \rceil, d)) &= \sum_{i=1}^{N-1} \gamma_i \exp(-y_i w_l) \\ &= \sum_{y_i=1} \gamma_i \exp(-w_l) + \sum_{y_i=-1} \gamma_i \exp(w_l) \end{aligned}$$

where

$$\gamma_i = L(\tilde{D}(\lceil \epsilon \rceil, d) - y_i w_l)$$

which is fixed with a fixed  $w_r$ .

And we can further derive the optimal  $w_l$  at each update step

$$\begin{aligned} \sum_{y_i=1} \gamma_i (-\exp(-w_l^*)) + \sum_{y_i=-1} \gamma_i \exp(w_l^*) &= 0 \\ \sum_{y_i=1} \gamma_i \exp(-w_l^*) &= \sum_{y_i=-1} \gamma_i \exp(w_l^*) \\ w_l^* &= \ln \frac{\sum_{y_i=1} \gamma_i}{\sum_{y_i=-1} \gamma_i} / 2. \end{aligned}$$

### C. Robustness verification for ensemble trees

In this section, we provide the detail algorithm of robustness verification for ensemble trees. This algorithm is based on the robustness verification framework in (Chen et al., 2019b). In Algorithm 1, we describe the modified function `CliqueEnumerate`, which is the key procedure of this framework. The main difference is that after we form the initial set of cliques, we will recheck whether the formed cliques have intersection with the  $\ell_p$  perturbation ball (line 18 to 22).

### D. Proof of Theorem 2

*Proof.* By definition, we have

$$\begin{aligned} L(\tilde{D}(\lceil \epsilon \rceil, d)) &= L(\min(\tilde{D}_L(\lceil \epsilon \rceil, d), \tilde{D}_R(\lceil \epsilon \rceil, d))) \\ &= \max(L(\tilde{D}_L(\lceil \epsilon \rceil, d)), L(\tilde{D}_R(\lceil \epsilon \rceil, d))). \end{aligned}$$

Exponential loss  $L$  is convex and monotonically increasing;  $L(\tilde{D}_L(\lceil \epsilon \rceil, d))$  and  $L(\tilde{D}_R(\lceil \epsilon \rceil, d))$  are both jointly convex in  $w_l, w_r$ . Note that the dynamic programming related terms become constants after they are computed, so they are irrelevant to  $w_l, w_r$ . Therefore,  $L(\tilde{D}(\lceil \epsilon \rceil, d))$  and further  $\sum_{i=0}^{N-1} L(\tilde{D}(\lceil \epsilon \rceil, d))$  are jointly convex in  $w_l, w_r$ .  $\square$

| Dataset             | ensemble stumps lr. | ensemble trees lr. | $\ell_1$ training          |
|---------------------|---------------------|--------------------|----------------------------|
|                     |                     |                    | ensemble trees sample size |
| breast-cancer       | 0.4                 | -                  | -                          |
| diabetes            | 0.4                 | -                  | -                          |
| Fashion-MNIST shoes | 0.4                 | 1.0                | 5000                       |
| MNIST 1 vs. 5       | 0.4                 | 1.0                | 5000                       |
| MNIST 2 vs. 6       | 0.4                 | 1.0                | 5000                       |

Table 6. **Detail settings of the experiments.** Here we report the learning rate of different training methods for ensemble stumps and trees. We also report the sample size in experiments for ensemble tree training and the scheduling length in  $\ell_p$  robust training for ensemble stumps.

#### D.1. Detail settings of the experiments

Here we report the detail settings of our experiments in Table 6. For most of the experiments, we follow the learning rate settings in (Andriushchenko & Hein, 2019). For  $\epsilon$  scheduling length, we empirically set to the best value near  $\epsilon_p / \epsilon_{std}$  for each dataset and  $\epsilon$  settings (e.g., for  $\ell_1$  norm training, the best schedule length is among 2, 3 and 4 epochs for  $\epsilon_1 = 1.0$  and  $\epsilon_{std} = 0.3$ ). Here the  $\epsilon_{std}$  is  $\epsilon_\infty$  used in (Andriushchenko & Hein, 2019). For each dataset, different methods are trained with the same group of parameters.

For  $\ell_1$  robust training for ensemble trees, we use a subsample of training datasets to reduce training time. On Fashion-MNIST shoes, MNIST 1 vs. 5 and MNIST 2 vs. 6 datasets, we subsample 5000 images of the selected classes from the original dataset. For  $\ell_2$  robust training, we subsample 1000 images of the selected classes from the original dataset.

#### D.2. $\ell_\infty$ vs. $\ell_p$ robust training

For a binary classifier  $y = \text{sgn}(F(x))$ , and a fixed  $\epsilon$ , we have  $\min_{\|\delta\|_p \leq \epsilon} yF(x + \delta) \geq \min_{\|\delta\|_\infty \leq \epsilon} yF(x + \delta)$ . Therefore, the exact  $\ell_\infty$  robust loss can be a natural upper bound of  $\ell_p$  robust loss. This explains the close result from  $\ell_\infty$  and  $\ell_p$  robust training, when using the same  $\epsilon$ . However, this  $\ell_\infty$  upper bound tends to hurt the clean accuracy, which we can see from Table 4. Additionally, unlike  $\ell_1$  or  $\ell_2$  norms, it is impossible to set this  $\ell_\infty$  perturbation to a large value (e.g.,  $\epsilon_\infty = 1.0$ ).

## E. Additional experiment results

### E.1. Comparison of $\ell_\infty$ robustness

In this section, we report the  $\ell_\infty$  verified errors of models in Table 4. For each model in the table, we verify the models using  $\ell_\infty$  robustness verification of decision stumps (Andriushchenko & Hein, 2019) with perturbation norm  $\epsilon_\infty$ . In general, Andriushchenko & Hein (2019) produces better  $\ell_\infty$  norm verification error because it is designed for that case, but when training using our  $\ell_1$  robust training procedure with a larger  $\ell_1$ , models also get relatively good  $\ell_\infty$  robustness. Note that here we train different number of stumps for different  $\epsilon_1$  (e.g. For MNIST dataset, we train 20 stumps for  $\epsilon_1 = 0.3$  and 40 stumps for  $\epsilon_1 = 1.0$ ). And for a fixed  $\epsilon$ , we train the  $\ell_\infty$  robust model with the same number of stumps with other methods when making comparisons.

| Dataset             |                   |              | standard training           | $\ell_\infty$ training      | $\ell_1$ training           |
|---------------------|-------------------|--------------|-----------------------------|-----------------------------|-----------------------------|
| name                | $\epsilon_\infty$ | $\epsilon_1$ | $\ell_\infty$ verified err. | $\ell_\infty$ verified err. | $\ell_\infty$ verified err. |
| breast-cancer       | 0.3               | 1.0          | 88.32%                      | 10.94%                      | 17.51%                      |
| diabetes            | 0.05              | 0.05         | 42.85%                      | 35.06%                      | 31.81%                      |
| Fashion-MNIST shoes | 0.1               | 0.1          | 69.85%                      | 11.35%                      | 11.75%                      |
|                     | 0.2               | 0.5          | 98.85%                      | 19.30%                      | 27.60%                      |
| MNIST 1 vs. 5       | 0.3               | 0.3          | 67.09%                      | 4.09%                       | 4.05%                       |
|                     | 0.3               | 1.0          | 66.20%                      | 3.60%                       | 11.59%                      |
| MNIST 2 vs. 6       | 0.3               | 0.3          | 97.74%                      | 8.63%                       | 9.10%                       |
|                     | 0.3               | 1.0          | 100.0%                      | 8.69%                       | 15.28%                      |

Table 7.  $\ell_\infty$  robustness of ensemble decision stumps. This table reports the  $\ell_\infty$  robustness for the same set of models in Table 4. For each dataset, we evaluate standard models, the  $\ell_\infty$  robust models trained using (Andriushchenko & Hein, 2019) with perturbation norm  $\epsilon_\infty$ , and our  $\ell_p$  robust model with  $p = 1$  and perturbation norm  $\epsilon_1$ . We test the models with  $\ell_\infty$  norm perturbation  $\epsilon_\infty$ . Standard test errors are omitted as they are the same as in Table 4.

### E.2. $\ell_2$ robust training

In Section 5 we mainly presented results for the  $p = 1$  setting, however our robust training procedure works for general  $\ell_p$  norm. In this section, we show some  $\ell_2$  robust training results. For each dataset, we train three models using standard training,  $\ell_\infty$  robust training (Andriushchenko & Hein, 2019) with  $\ell_\infty$  perturbation norm  $\epsilon_\infty$ , and  $\ell_p$  robust training with  $p = 2$  and  $\ell_2$  perturbation norm  $\epsilon_2$ . And in Table 8 and 9, we report the verification results of these models from  $\ell_2$  verification.

| Dataset             |                   |              | standard training |                        | $\ell_\infty$ training |                        | $\ell_2$ training |                        |
|---------------------|-------------------|--------------|-------------------|------------------------|------------------------|------------------------|-------------------|------------------------|
| name                | $\epsilon_\infty$ | $\epsilon_2$ | standard err.     | $\ell_2$ verified err. | standard err.          | $\ell_2$ verified err. | standard err.     | $\ell_2$ verified err. |
| breast-cancer       | 0.3               | 0.7          | 0.73%             | 97.08%                 | 4.37%                  | 99.27%                 | 8.76%             | <b>39.42%</b>          |
| Fashion-MNIST shoes | 0.2               | 0.4          | 5.05%             | 69.85%                 | 9.25%                  | 81.05%                 | 14.55%            | <b>49.55%</b>          |
| MNIST 1 vs. 5       | 0.3               | 0.8          | 0.59%             | 67.09%                 | 1.33%                  | 66.45%                 | 4.44%             | <b>36.56%</b>          |
| MNIST 2 vs. 6       | 0.3               | 0.8          | 2.81%             | 97.74%                 | 3.91%                  | 85.52%                 | 13.67%            | <b>76.98%</b>          |

Table 8.  $\ell_2$  robust training for ensemble stumps In this table, we train the model with  $p = 2$  and compare the results with  $\ell_\infty$  trained models. For each dataset, we train three models using standard training,  $\ell_\infty$  norm robust training with  $\epsilon_\infty$  and  $\ell_2$  norm robust training with  $\epsilon_2$ . And we test and compare the  $\ell_2$  robustness of these models using  $\ell_2$  robust verification.

| Dataset             |                   |              |          |       | standard training |               | $\ell_\infty$ training (Andriushchenko & Hein, 2019) |               | $\ell_2$ training (ours) |               |
|---------------------|-------------------|--------------|----------|-------|-------------------|---------------|------------------------------------------------------|---------------|--------------------------|---------------|
| name                | $\epsilon_\infty$ | $\epsilon_2$ | n. trees | depth | standard err.     | verified err. | standard err.                                        | verified err. | standard err.            | verified err. |
| Fashion-MNIST shoes | 0.2               | 0.4          | 3        | 5     | 8.05%             | 99.40%        | 7.65%                                                | 93.49%        | 17.36%                   | <b>68.23%</b> |
| breast-cancer       | 0.3               | 0.8          | 5        | 5     | 1.47%             | 97.06%        | 1.47%                                                | 97.79%        | 12.50%                   | <b>55.88%</b> |
| MNIST 1 vs. 5       | 0.3               | 0.8          | 3        | 5     | 2.37%             | 100.0%        | 2.12%                                                | 97.72%        | 23.25%                   | <b>50.54%</b> |
| MNIST 2 vs. 6       | 0.3               | 0.8          | 3        | 5     | 3.82%             | 100.0%        | 3.12%                                                | 100.0%        | 19.80%                   | <b>93.56%</b> |

Table 9.  $\ell_2$  robust training for tree ensembles. We report standard and  $\ell_2$  robust test error for all the three methods. We also report  $\epsilon_\infty$  and  $\epsilon_2$  for each dataset, and the number of trees in each ensemble.

**Algorithm 1** Enumerating all  $K$ -cliques on a  $K$ -partite graph with  $\epsilon_p$ , dimension  $d$  and example  $x$

**input:**  $V_1, V_2, \dots, V_K$  are the  $K$  independent sets (“parts”) of a  $K$ -partite graph; the graph is defined similarly as in Chen et al. (2019b).

```

1 for  $k \leftarrow 1, 2, 3, \dots, K$  do
2    $U_k \leftarrow \{(A_i, B^{i^{(k)}}) | i^{(k)} \in V_k, A_i = \{i^{(k)}\}\}$  /*  $U$  is a set of tuples  $(A, B)$ , which stores a
   set of cliques and their corresponding boxes.  $A$  is the set of nodes in one clique
   and  $B$  is the corresponding box of this clique. Initially, each node in  $V_k$  forms a
   1-clique itself. */
3 end
4 CliqueEnumerate( $U_1, U_2, \dots, U_K$ )
5 Function CliqueEnumerate( $U_1, U_2, \dots, U_K$ )
6    $\hat{U}_{old} \leftarrow U_1$ 
7   for  $k \leftarrow 2, 3, \dots, K$  do
8      $\hat{U}_{new} \leftarrow \emptyset$ 
9     for  $(\hat{A}, \hat{B}) \in \hat{U}_{old}$  do
10      for  $(A, B) \in U_k$  do
11        if  $B \cap \hat{B} \neq \emptyset$  then
12          /* A  $k$ -clique is found; add it as a pseudo node with the intersection of
13             two boxes. */
14           $\hat{U}_{new} \leftarrow \hat{U}_{new} \cup \{(A \cup \hat{A}, B \cap \hat{B})\}$ 
15        end
16      end
17    end
18     $\hat{U}_{old} \leftarrow \hat{U}_{new}$ 
19  end
20   $\hat{U} \leftarrow \emptyset$ 
21  for  $(A, B) \in \hat{U}_{new}$  do
22    if CheckClique( $B, d, p, \epsilon_p$ ) then
23      /* After finding all the  $k$ -cliques, we need to recheck whether these cliques have
24         intersection with the  $\ell_p$  perturbation ball around the example  $x$ . */
25       $\hat{U} \leftarrow \hat{U} \cup \{(A, B)\}$ 
26    end
27  end
28  return  $\hat{U}$ 
29 end

```
